# Supplementary material for: Persistence of symptoms and quality of life at 35 days after hospitalization for COVID-19 infection
Source: PubMed Central journal article supplement (PMC7732078; doi:10.1371/journal.pone.0243882), 2020-12-11
Supplement: pone.0243882.s001.pdf [file pone.0243882.s001.pdf]

**Summary Data Demographics of Discharged COVID-19 Patients (n=183)**

| Variable       | Level                          | Frequency(percentage) |
|----------------|--------------------------------|-----------------------|
| Gender         | Female                         | 69(38.33)             |
| Gender         | Male                           | 111(61.67)            |
| Race           | Black or African American      | 15(8.29)              |
| Race           | White                          | 99(54.70)             |
| Race           | Asian                          | 6(3.31)               |
| Race           | American Indian/Alaskan Native | 2(1.10)               |
| Race           | Other                          | 56(30.94)             |
| Race           | Unknown                        | 3(1.66)               |
| Ethnicity      | Hispanic                       | 54(30.00)             |
| Ethnicity      | Non-Hispanic                   | 119(66.11)            |
| Ethnicity      | Unknown                        | 7(3.89)               |
| Other race     | Arabic                         | 1(4.76)               |
| Other race     | Cuban                          | 1(4.76)               |
| Other race     | East Asian                     | 1(4.76)               |
| Other race     | Filipino                       | 7(33.33)              |
| Other race     | Hispanic                       | 5(23.81)              |
| Other race     | Hispanic N                     | 1(4.76)               |
| Other race     | Mixed                          | 1(4.76)               |
| Other race     | Not Clear                      | 1(4.76)               |
| Other race     | Not Listed                     | 1(4.76)               |
| Other race     | Other Race                     | 1(4.76)               |
| Other race     | Phillipino                     | 1(4.76)               |
| Hypertension   | Unchecked                      | 97(53.01)             |
| Hypertension   | Checked                        | 86(46.99)             |
| Diabetes       | Unchecked                      | 131(71.58)            |
| Diabetes       | Checked                        | 52(28.42)             |
| COPD           | Unchecked                      | 176(96.17)            |
| COPD           | Checked                        | 7(3.83)               |
| Asthma         | Unchecked                      | 164(89.62)            |
| Asthma         | Checked                        | 19(10.38)             |
| Cardiac issues | Unchecked                      | 162(88.52)            |
| Cardiac issues | Checked                        | 21(11.48)             |
| CRF/ESRD       | Unchecked                      | 175(95.63)            |

| Variable                 | Level             | Frequency(percentage)         |
|--------------------------|-------------------|-------------------------------|
| CRF/ESRD                 | Checked           | 8(4.37)                       |
| CVD                      | Unchecked         | 176(96.17)                    |
| CVD                      | Checked           | 7(3.83)                       |
| Immuno-deficient disease | Unchecked         | 176(96.17)                    |
| Immuno-deficient disease | Checked           | 7(3.83)                       |
| Cancer                   | Unchecked         | 165(90.16)                    |
| Cancer                   | Checked           | 18(9.84)                      |
| None                     | Unchecked         | 143(78.14)                    |
| None                     | Checked           | 40(21.86)                     |
| Other comorbidity        | Unchecked         | 108(59.02)                    |
| Other comorbidity        | Checked           | 75(40.98)                     |
| Other Comorbidity        | AFiib             | 1(1.33) cardiac arrhythmia    |
| Other Comorbidity        | Anxiety, depressi | 1(1.33) psych                 |
| Other Comorbidity        | Atrial fibrillati | 1(1.33) cardiac arrhythmia    |
| Other Comorbidity        | BPH, GERD         | 1(1.33) GERD                  |
| Other Comorbidity        | Fatty liver, High | 1(1.33) liver disease         |
| Other Comorbidity        | GERD              | 3(4.00) GERD                  |
| Other Comorbidity        | GERD, Sleep Apnea | 1(1.33) GERD, sleep apnea     |
| Other Comorbidity        | Gout              | 1(1.33) delete                |
| Other Comorbidity        | HIV               | 1(1.33) immunodeficiency      |
| Other Comorbidity        | HLD               | 4(5.33) hyperlipidemia        |
| Other Comorbidity        | HLD, Anxiety, IBS | 1(1.33) hyperlipidemia, psych |
| Other Comorbidity        | HLD, Depression   | 1(1.33) hyperlipidemia, psych |
| Other Comorbidity        | Hepatitis B       | 1(1.33) liver disease         |
| Other Comorbidity        | Hyperlipidemia    | 2(2.67)hyperlipidema          |
| Other Comorbidity        | Hyperlipidemia, o | 1(1.33) hyperlipidemia        |
| Other Comorbidity        | Hypothyroidism    | 3(4.00) delete                |

| Variable          | Level                    | Frequency(percentage)                                     |
|-------------------|--------------------------|-----------------------------------------------------------|
| Other Comorbidity | MS                       | 1(1.33)<br>immunodeficiency                               |
| Other Comorbidity | OSA, HLD                 | 1(1.33) sleep<br>apnea,<br>hyperlipidemia                 |
| Other Comorbidity | PE, stem cell transplant | 1(1.33)<br>Thromboembolic<br>disease,<br>immunodeficiency |
| Other Comorbidity | PTSD, Depression         | 1(1.33)psych                                              |
| Other Comorbidity | Pregnancy - 26 WG        | 1(1.33)pregnancy                                          |
| Other Comorbidity | Pregnant                 | 1(1.33)pregnancy                                          |
| Other Comorbidity | Renal transplant         | 1(1.33)ESRD,<br>immunodeficiency                          |
| Other Comorbidity | Rheumatoid arthritis     | 1(1.33)immunodefi<br>ciency (rheum)                       |
| Other Comorbidity | Schizophrenia            | 1(1.33)psych                                              |
| Other Comorbidity | Sjogren's syndrome       | 1(1.33)<br>immunodeficiency<br>(rheum)                    |
| Other Comorbidity | alcoholic liver d        | 1(1.33) liver<br>disease                                  |
| Other Comorbidity | anxiety                  | 1(1.33) psych                                             |
| Other Comorbidity | arthritis, obesity       | 1(1.33) obesity                                           |
| Other Comorbidity | chronic hepatitis        | 1(1.33) liver<br>disease                                  |
| Other Comorbidity | depression               | 2(2.67)psych                                              |
| Other Comorbidity | dyslipidemia             | 1(1.33)<br>hyperlipidemia                                 |
| Other Comorbidity | elevated cholesterol     | 1(1.33)<br>hyperlipidemia                                 |
| Other Comorbidity | factor 9 deficiency      | 1(1.33)<br>thromboembolic<br>diease                       |
| Other Comorbidity | fatty liver              | 1(1.33) liver disease                                     |
| Other Comorbidity | gastric ulcer            | 1(1.33) skip                                              |
| Other Comorbidity | hyperlipidemia           | 3(4.00)<br>hyperlipidemia                                 |
| Other Comorbidity | hyperlipidemia, O        | 1(1.33)<br>hyperlipidemia                                 |
| Other Comorbidity | hyperlipidemia, r        | 1(1.33)<br>hyperlipidemia                                 |

| Variable          | Level                   | Frequency(percentage)                         |
|-------------------|-------------------------|-----------------------------------------------|
| Other Comorbidity | hyperlipidemia, s       | 1(1.33)<br>hyperlipidemia                     |
| Other Comorbidity | hypothyroidism          | 3(4.00) skip                                  |
| Other Comorbidity | hypothyroidism(gr       | 1(1.33) skip                                  |
| Other Comorbidity | hypothyroidism, u       | 1(1.33) skip                                  |
| Other Comorbidity | liver disease           | 1(1.33) liver<br>disease                      |
| Other Comorbidity | liver transplant,       | 1(1.33) liver<br>disease,<br>immunodeficiency |
| Other Comorbidity | lung cancer, rheumatism | 1(1.33) cancer                                |
| Other Comorbidity | lupus, clotting d       | 1(1.33)<br>thromboembolic<br>disease          |
| Other Comorbidity | obesity                 | 1(1.33) obesity                               |
| Other Comorbidity | obesity (BMI 30.5       | 1(1.33) obesity                               |
| Other Comorbidity | obesity s/p obesity     | 1(1.33) obesity                               |
| Other Comorbidity | obstructive sleep       | 1(1.33) sleep<br>apnea                        |
| Other Comorbidity | pregnant                | 1(1.33) pregnancy                             |
| Other Comorbidity | psoriasis               | 1(1.33)<br>immunodeficiency<br>(rheum)        |
| Other Comorbidity | pulmonary embolism      | 1(1.33)<br>thromboembolic<br>disease          |
| Other Comorbidity | rheumatoid arthritis    | 1(1.33)<br>immunodeficiency<br>(rheum)        |
| Other Comorbidity | sarcoidosis             | 1(1.33) lung<br>disease, other                |
| Other Comorbidity | sciatic hernia          | 1(1.33) skip                                  |
| Other Comorbidity | Sjogren's syndrome      | 1(1.33)<br>immunodeficiency<br>(rheum)        |
| Other Comorbidity | sleep apnea             | 1(1.33) sleep<br>apnea                        |
| Other Comorbidity | sleep apnea, HLD        | 1(1.33) sleep<br>apnea,<br>hyperlipidemia     |
| Other Comorbidity | sleep apnea, anxiety    | 1(1.33) sleep<br>apnea, psych                 |

| Variable           | Level                                        | Frequency(percentage)             |
|--------------------|----------------------------------------------|-----------------------------------|
| Other Comorbidity  | sleep apnea, renal                           | 1(1.33) sleep apnea               |
| DVT                | At admission                                 | 2(1.12)thromboembolic disease     |
| DVT                | Developed during hospitalization for COVID-1 | 5(2.81) thromboembolic disease    |
| DVT                | Not applicable                               | 171(96.07) thromboembolic disease |
| Cardiac CHF        | Unchecked                                    | 178(97.27)cardiac HF              |
| Cardiac CHF        | Checked                                      | 5(2.73) cardiacHF                 |
| Cardiac MI         | Unchecked                                    | 179(97.81) Cardiac CAD            |
| Cardiac MI         | Checked                                      | 4(2.19) Cardiac CAD               |
| Cardiac CAD        | Unchecked                                    | 175(95.63) Cardiac CAD            |
| Cardiac cad        | Checked                                      | 8(4.37) Cardiac CAD               |
| Cardiac arrhythmia | Unchecked                                    | 178(97.27) Cardiac arrhythmia     |
| Cardiac arrhythmia | Checked                                      | 5(2.73) Cardiac arrhythmia        |
| Cardiomyopathy     | Unchecked                                    | 182(99.45) Cardiac HF             |
| Cardiomyopathy     | Checked                                      | 1(0.55) Cardiac HF                |
| Cardiac surgery sp | Unchecked?                                   | 181(98.91) Cardiac CAD?           |
| Cardiac surgery sp | Checked                                      | 2(1.09) Cardiac CAD               |
| Cardiac other      | Unchecked                                    | 174(95.08) ??                     |
| Cardiac other      | Checked                                      | 9(4.92) Cardiac NOS               |
| Cardiac arrythmia  | A                                            | 1(20.00) Cardiac arrhythmia       |
| Cardiac arrythmia  | a                                            | 2(40.00) Cardiac arrhythmia       |
| Cardiac arrythmia  | h                                            | 1(20.00) Cardiac arrhythmia       |
| Cardiac arrythmia  | p                                            | 1(20.00) Cardiac arrhythmia       |

| Variable      | Level                                    | Frequency(percentage)                          |
|---------------|------------------------------------------|------------------------------------------------|
| Other cardiac | LV thrombus                              | 1(11.11)<br>Thromboembolic<br>disease          |
| Other cardiac | Mitral valve prolapse, mitral<br>regur   | 1(11.11) Cardiac<br>VHD                        |
| Other cardiac | RBBB noted in admission note             | 1(11.11) Cardiac<br>arrhythmia                 |
| Other cardiac | RVOT, s/p ablation                       | 1(11.11) Cardiac<br>CAD                        |
| Other cardiac | pacemaker, pulmonary<br>hypertension     | 1(11.11) Cardiac<br>arrhythmia                 |
| Other cardiac | pacemaker, stents                        | 1(11.11) Cardiac<br>arrhythmia, cardiac<br>CAD |
| Other cardiac | s/p PCI (2011)                           | 1(11.11) cardiac<br>CAD                        |
| Other cardiac | valvular heart disease                   | 1(11.11) cardiac<br>VHD                        |
| Other cardiac | valvular heart disease,<br>pulmonary h   | 1(11.11) cardiac<br>VHD                        |
| Cancertypev2  | All in remission on<br>immunosuppressant | 1(5.56)<br>immunosuppresse<br>d                |
| Cancertypev2  | B-cell Lymphoma                          | 1(5.56)<br>immunosuppresse<br>d (cancer)       |
| Cancertypev2  | Bladder                                  | 1(5.56)                                        |
| Cancertypev2  | DLBCL, prostate                          | 1(5.56)                                        |
| Cancertypev2  | Hairy cell leukemia                      | 1(5.56)<br>immunosuppresse<br>d (cancer)       |
| Cancertypev2  | MDS s/p BMT (11 yrs ago)                 | 1(5.56)<br>immunosuppresse<br>d (cancer)       |
| Cancertypev2  | Prostrate                                | 1(5.56)                                        |
| Cancertypev2  | bladder , kidney , prostate              | 1(5.56)                                        |
| Cancertypev2  | breast cancer                            | 2(11.11) cancer,<br>solid                      |
| Cancertypev2  | colorectal                               | 1(5.56) cancer,<br>solid                       |
| Cancertypev2  | lung cancer                              | 2(11.11) cancer,<br>solid                      |
| Cancertypev2  | multiple myeloma                         | 2(11.11)immunosu<br>ppressed (cancer)          |

| Variable     | Level           | Frequency(percentage)  |
|--------------|-----------------|------------------------|
| Cancertypev2 | prostate cancer | 2(11.11) cancer, solid |
| Cancertypev2 | thyroid         | 1(5.56) cancer, solid  |

All Entries Are Count(Percentages)

### ***Summary Data Discharge Symptoms of Discharged COVID-19 Patients (n=183)***

| Variable                              | Level     | Frequency (percentage) |
|---------------------------------------|-----------|------------------------|
| Discharge Symptoms                    | Yes       | 156 (85.25)            |
| Discharge Symptoms                    | No        | 27 (14.75)             |
| Symptom Discharge Shortness of Breath | Unchecked | 89 (48.63)             |
| Symptom Discharge Shortness of Breath | Checked   | 94 (51.37)             |
| Symptom Discharge Cough               | Unchecked | 109 (59.56)            |
| Symptom Discharge Cough               | Checked   | 74 (40.44)             |
| Symptom Discharge Fatigue             | Unchecked | 79 (43.17)             |
| Symptom Discharge Fatigue             | Checked   | 104 (56.83)            |
| Symptom Discharge Muscle Pain         | Unchecked | 146 (79.78)            |
| Symptom Discharge Muscle Pain         | Checked   | 37 (20.22)             |
| Symptom Discharge Joint Pain          | Unchecked | 165 (90.16)            |
| Symptom Discharge Joint Pain          | Checked   | 18 (9.84)              |
| Symptom Discharge Headache            | Unchecked | 159 (86.89)            |
| Symptom Discharge Headache            | Checked   | 24 (13.11)             |
| Symptom Discharge Lack of Taste       | Unchecked | 143 (78.14)            |
| Symptom Discharge Lack of Taste       | Checked   | 40 (21.86)             |
| Symptom Discharge P Mouth Ulcer       | Unchecked | 180 (98.36)            |
| Symptom Discharge P Mouth Ulcer       | Checked   | 3 (1.64)               |
| Symptoms Discharge Lack of Smell      | Unchecked | 155 (84.70)            |
| Symptoms Discharge Lack of Smell      | Checked   | 28 (15.30)             |
| Symptoms Discharge Diarrhea           | Unchecked | 154 (84.15)            |
| Symptoms Discharge Diarrhea           | Checked   | 29 (15.85)             |
| Symptoms Discharge Eye Irritation     | Unchecked | 170 (92.90)            |
| Symptoms Discharge Eye Irritation     | Checked   | 13 (7.10)              |

| Variable                      | Level           | Frequency (percentage) |
|-------------------------------|-----------------|------------------------|
| Symptoms Discharge Phlegm     | Unchecked       | 158 (86.34)            |
| Symptoms Discharge Phlegm     | Checked         | 25 (13.66)             |
| Symptoms Discharge Fever      | Unchecked       | 179 (97.81)            |
| Symptoms Discharge Fever      | Checked         | 4 (2.19)               |
| Symptoms Discharge Confusion  | Unchecked       | 168 (91.80)            |
| Symptoms Discharge Confusion  | Checked         | 15 (8.20)              |
| Symptoms Discharge Other      | Unchecked       | 149 (81.42)            |
| Symptoms Discharge Other      | Checked         | 34 (18.58)             |
| Symptoms Discharge Not Answer | Unchecked       | 183 (100.00)           |
| Other Symptoms Discharge      | "throat ti      | 1 (3.03)               |
| Other Symptoms Discharge      | Anger           | 1 (3.03)               |
| Other Symptoms Discharge      | Constipation    | 1 (3.03)               |
| Other Symptoms Discharge      | GERD            | 1 (3.03)               |
| Other Symptoms Discharge      | Hair loss       | 1 (3.03)               |
| Other Symptoms Discharge      | Pleural pa      | 1 (3.03)               |
| Other Symptoms Discharge      | Stomach ac      | 1 (3.03)               |
| Other Symptoms Discharge      | Vasculitis      | 1 (3.03)               |
| Other Symptoms Discharge      | anxiety, d      | 1 (3.03)               |
| Other Symptoms Discharge      | burning chest   | 1 (3.03)               |
| Other Symptoms Discharge      | chest pain      | 1 (3.03)               |
| Other Symptoms Discharge      | chest tightness | 2 (6.06)               |
| Other Symptoms Discharge      | difficulty      | 1 (3.03)               |
| Other Symptoms Discharge      | dizziness       | 3 (9.09)               |
| Other Symptoms Discharge      | dizzy - di      | 1 (3.03)               |
| Other Symptoms Discharge      | first week      | 1 (3.03)               |
| Other Symptoms Discharge      | had stroke      | 1 (3.03)               |
| Other Symptoms Discharge      | loss of ap      | 1 (3.03)               |
| Other Symptoms Discharge      | mild pain       | 1 (3.03)               |
| Other Symptoms Discharge      | minor pain      | 1 (3.03)               |
| Other Symptoms Discharge      | not s           | 1 (3.03)               |
| Other Symptoms Discharge      | numbness o      | 1 (3.03)               |
| Other Symptoms Discharge      | purple toe      | 1 (3.03)               |
| Other Symptoms Discharge      | rapid hear      | 1 (3.03)               |
| Other Symptoms Discharge      | smell heig      | 1 (3.03)               |
| Other Symptoms Discharge      | sore throat     | 1 (3.03)               |



| Variable                      | Level      | Frequency (percentage) |
|-------------------------------|------------|------------------------|
| Other Symptoms Discharge      | swollen le | 1 (3.03)               |
| Other Symptoms Discharge      | trouble re | 1 (3.03)               |
| Other Symptoms Discharge      | vertigo, d | 1 (3.03)               |
| Other Symptoms Discharge      | vomiting   | 1 (3.03)               |
| Discharged Home               | Unchecked  | 13 (7.10)              |
| Discharged Home               | Checked    | 170 (92.90)            |
| Discharged Home Care          | Unchecked  | 176 (96.17)            |
| Discharged Home Care          | Checked    | 7 (3.83)               |
| Discharged Sub Acute Facility | Unchecked  | 178 (97.27)            |
| Discharged Sub Acute Facility | Checked    | 5 (2.73)               |
| Discharged Require Oxygen     | Unchecked  | 153 (83.61)            |
| Discharged Require Oxygen     | Checked    | 30 (16.39)             |
| Discharged Not Answer         | Unchecked  | 183 (100.00)           |

All entries are count(percentages)

### **Summary Data of Quality of Life of Discharged COVID-19 Patients (n=183)**

| <b>Living situation</b>                | <b>Frequency, N (Percentages, %)</b> |
|----------------------------------------|--------------------------------------|
| Lives alone                            | 22 (12.02)                           |
| Lives with family                      | 147 (80.33)                          |
| Lives with roommates                   | 8 (4.37)                             |
| Lives with boyfriend/girlfriend/fiancé | 4 (2.20)                             |
| Other-unspecified                      | 1 (0.55)                             |
| I do not want to answer this question  | 1 (0.55)                             |
| <b>Missing values: 0</b>               |                                      |

| <b>Do you have any other family member that got sick with COVID-19?</b> | <b>Frequency, N (Percentages, %)</b> |
|-------------------------------------------------------------------------|--------------------------------------|
| Yes                                                                     | 90 (52.02)                           |
| Was your family member hospitalized?                                    |                                      |
| Yes                                                                     | 22 (24.72)                           |
| No                                                                      | 67 (75.28)                           |
| No                                                                      | 81 (46.82)                           |
| I do not want to answer this question                                   | 2 (1.16)                             |
| <b>Missing values: 10</b>                                               |                                      |

| <b>How is your family member doing now?</b>                                    | <b>Frequency, N (Percentages, %)</b> |
|--------------------------------------------------------------------------------|--------------------------------------|
| Fully recovered / back to normal                                               | 67 (79.06)                           |
| Better, recovering (but not fully recovered)                                   | 10 (10.18)                           |
| Still experiencing symptoms                                                    | 3 (3.53)                             |
| Still sick                                                                     | 2 (2.35)                             |
| Deceased                                                                       | 3 (3.53)                             |
| <b>Missing values: 5 (of the 90 that reported that someone got sick above)</b> |                                      |

| <b>Current employment status</b> | <b>Frequency, N (Percentages, %)</b> |
|----------------------------------|--------------------------------------|
| Employed                         | 95 (52.20)                           |
| Unemployed                       | 87 (47.80)                           |
| <b>Missing values: 1</b>         |                                      |

| <b>Currently working (return to work)</b> | <b>Frequency, N (Percentages, %)</b> |
|-------------------------------------------|--------------------------------------|
| Employed                                  | 49 (29.88)                           |
| Unemployed                                | 114 (69.51)                          |
| I do not want to answer this question     | 1 (0.61)                             |
| <b>Missing values: 1</b>                  |                                      |

| <b>Category</b>                 | <b>Level</b> |             |             |                  |                  |
|---------------------------------|--------------|-------------|-------------|------------------|------------------|
|                                 | <b>Poor</b>  | <b>Fair</b> | <b>Good</b> | <b>Very good</b> | <b>Excellent</b> |
| <b>General Health</b>           | 2 (1.09)     | 35 (19.13)  | 70 (38.25)  | 57 (31.15)       | 19 (10.38)       |
| <b>Quality of Life</b>          | 7 (3.87)     | 35 (19.34)  | 67 (37.02)  | 47 (25.97)       | 25 (13.81)       |
| <b>Overall Physical Health</b>  | 4 (2.21)     | 45 (24.86)  | 62 (34.25)  | 57 (31.49)       | 13 (7.18)        |
| <b>Overall Mental Health</b>    | 4 (2.19)     | 27 (14.75)  | 72 (39.34)  | 50 (27.32)       | 30 (16.39)       |
| <b>Social Relationships</b>     | 9 (4.95)     | 38 (20.88)  | 63 (34.62)  | 49 (26.92)       | 23 (12.64)       |
| <b>Social Activities, Roles</b> | 8 (4.42)     | 49 (27.07)  | 54 (29.83)  | 49 (27.07)       | 21 (11.60)       |

|                                | <b>Level</b>       |                 |                   |               |                   |
|--------------------------------|--------------------|-----------------|-------------------|---------------|-------------------|
| <b>Category</b>                | <b>Not at all</b>  | <b>A little</b> | <b>Moderately</b> | <b>Mostly</b> | <b>Completely</b> |
| <b>Daily Physical Activity</b> | 1 (0.55)           | 24 (13.26)      | 45 (24.86)        | 51 (28.18)    | 60 (33.15)        |
|                                | <b>Always</b>      | <b>Often</b>    | <b>Sometimes</b>  | <b>Rarely</b> | <b>Never</b>      |
| <b>Emotional problems</b>      | 0                  | 26 (14.21)      | 64 (34.97)        | 39 (21.31)    | 54 (29.51)        |
|                                | <b>Very Severe</b> | <b>Severe</b>   | <b>Moderate</b>   | <b>Mild</b>   | <b>None</b>       |
| <b>Fatigue</b>                 | 1 (0.55)           | 14 (7.65)       | 60 (32.79)        | 57 (31.15)    | 51 (27.87)        |

|                                                                                                                      | <b>Level</b>         |                            |                        |                        |                                             |
|----------------------------------------------------------------------------------------------------------------------|----------------------|----------------------------|------------------------|------------------------|---------------------------------------------|
| <b>Category</b>                                                                                                      | <b>No difficulty</b> | <b>A little difficulty</b> | <b>Some difficulty</b> | <b>Much difficulty</b> | <b>I did not do this in the past 7 days</b> |
| <b>Dressing</b>                                                                                                      | 166 (90.71)          | 11 (6.01)                  | 3 (1.64)               | 3 (1.64)               | 0                                           |
| <b>Walking</b>                                                                                                       | 112 (61.54)          | 34 (18.68)                 | 20 (10.99)             | 7 (3.85)               | 9 (4.95)                                    |
| <b>20 stairs (2 flights) without stopping</b>                                                                        | 66 (36.07)           | 49 (26.78)                 | 31 (16.94)             | 18 (9.84)              | 19 (10.38)                                  |
| <b>Meal preparation</b>                                                                                              | 128 (70.72)          | 20 (11.05)                 | 8 (4.42)               | 2 (1.10)               | 23 (12.71)                                  |
| <b>Wash dishes</b>                                                                                                   | 140 (77.35)          | 13 (7.18)                  | 3 (1.66)               | 4 (2.21)               | 21 (11.60)                                  |
| <b>Sweeping or mopping</b>                                                                                           | 115 (63.89)          | 18 (10.00)                 | 12 (6.67)              | 6 (3.33)               | 29 (16.11)                                  |
| <b>Making the bed</b>                                                                                                | 134 (74.03)          | 16 (8.84)                  | 5 (2.76)               | 5 (2.76)               | 21 (11.60)                                  |
| <b>Lifting something weighing 10-20 lbs</b>                                                                          | 92 (50.27)           | 37 (20.22)                 | 23 (12.57)             | 10 (5.46)              | 21 (11.48)                                  |
| <b>Carrying something weighing 10-20 lbs (about 4.5-9kg, like a large bag of groceries) from one room to another</b> | 77 (42.08)           | 43 (23.50)                 | 27 (14.75)             | 14 (7.65)              | 22 (12.02)                                  |
| <b>Walking (faster than your usual speed) for ½ mile (almost 1 km) without stopping</b>                              | 39 (21.31)           | 35 (19.13)                 | 33 (18.03)             | 29 (15.85)             | 47 (25.68)                                  |

### **Univariable Analysis of Comorbidities vs General Health By Day 35 post discharge**

| <i>Outcome</i> | <i>Effect</i>                                                | <i>Odds Ratio</i> | <i>95% CI</i> | <i>P-Value</i> | <i>Pr &gt; Chi-Square</i> |
|----------------|--------------------------------------------------------------|-------------------|---------------|----------------|---------------------------|
| General Health | General Health Very good, excellent: gender Female vs Male   | 0.808             | (0.361,1.811) | 0.6050         | 0.7888                    |
| General Health | General Health Good: gender Female vs Male                   | 1.002             | (0.444,2.259) | 0.9969         | 0.7888                    |
| General Health | General Health Very good, excellent: AgeOlder Age>=60 vs Age | 0.955             | (0.432,2.112) | 0.9086         | 0.7186                    |
| General Health | General Health Good: Age Older Age>=60 vs Age<60             | 1.240             | (0.556,2.763) | 0.5995         | 0.7186                    |
| General Health | General Health Very good, excellent: Obese Obese vs Not Obes | 2.034             | (0.912,4.539) | 0.0828         | 0.0917                    |
| General Health | General Health Good: Obese Obese vs Not Obese                | 1.063             | (0.472,2.395) | 0.8822         | 0.0917                    |
| General Health | General Health Very good, excellent: Hypertension Checked vs | 0.723             | (0.328,1.594) | 0.4212         | 0.3121                    |
| General Health | General Health Good: Hypertension Checked vs Unchecked       | 0.539             | (0.241,1.206) | 0.1326         | 0.3121                    |
| General Health | General Health Very good, excellent: Diabetes Checked vs Unc | 0.627             | (0.273,1.443) | 0.2723         | 0.3334                    |
| General Health | General Health Good: Diabetes Checked vs Unchecked           | 0.527             | (0.223,1.245) | 0.1441         | 0.3334                    |
| General Health | General Health Very good, excellent: CardiacIssues Checked v | 0.649             | (0.191,2.203) | 0.4885         | 0.7188                    |
| General Health | General Health Good: CardiacIssues Checked vs Unchecked      | 0.944             | (0.292,3.055) | 0.9238         | 0.7188                    |
| General Health | General Health Very good, excellent: None Checked vs Uncheck | 1.488             | (0.533,4.156) | 0.4482         | 0.6281                    |
| General Health | General Health Good: None Checked vs Unchecked               | 1.656             | (0.591,4.643) | 0.3372         | 0.6281                    |

### **Univariable Analysis of Comorbidities vs Quality of Life By Day 35 post discharge**

| <i>Outcome</i>  | <i>Effect</i>                                                 | <i>Odds Ratio</i> | <i>95% CI</i> | <i>P-Value</i> | <i>Pr &gt; Chi-Square</i> |
|-----------------|---------------------------------------------------------------|-------------------|---------------|----------------|---------------------------|
| Quality of Life | Quality of Life Very good, excellent: gender Female vs Male   | 0.516             | (0.236,1.129) | 0.0977         | 0.2353                    |
| Quality of Life | Quality of Life Good: gender Female vs Male                   | 0.762             | (0.349,1.660) | 0.4934         | 0.2353                    |
| Quality of Life | Quality of Life Very good, excellent: AgeOlder Age>=60 vs Age | 0.660             | (0.305,1.427) | 0.2908         | 0.2688                    |
| Quality of Life | Quality of Life Good: AgeOlder Age>=60 vs Age<60              | 1.133             | (0.524,2.453) | 0.7507         | 0.2688                    |
| Quality of Life | Quality of Life Very good, excellent: Obese Obese vs Not Obes | 2.571             | (1.155,5.726) | 0.0207         | 0.0689                    |
| Quality of Life | Quality of Life Good: Obese Obese vs Not Obese                | 1.872             | (0.838,4.182) | 0.1263         | 0.0689                    |
| Quality of Life | Quality of Life Very good, excellent: Hypertension Checked vs | 0.895             | (0.418,1.916) | 0.7747         | 0.9579                    |
| Quality of Life | Quality of Life Good: Hypertension Checked vs Unchecked       | 0.914             | (0.423,1.978) | 0.8200         | 0.9579                    |
| Quality of Life | Quality of Life Very good, excellent: Diabetes Checked vs Unc | 0.690             | (0.294,1.614) | 0.3917         | 0.4576                    |
| Quality of Life | Quality of Life Good: Diabetes Checked vs Unchecked           | 1.091             | (0.476,2.500) | 0.8377         | 0.4576                    |
| Quality of Life | Quality of Life Very good, excellent: CardiacIssues Checked v | 0.625             | (0.209,1.868) | 0.4001         | 0.4745                    |
| Quality of Life | Quality of Life Good: CardiacIssues Checked vs Unchecked      | 0.492             | (0.153,1.580) | 0.2333         | 0.4745                    |
| Quality of Life | Quality of Life Very good, excellent: None Checked vs Uncheck | 1.545             | (0.582,4.104) | 0.3827         | 0.6726                    |
| Quality of Life | Quality of Life Good: None Checked vs Unchecked               | 1.442             | (0.534,3.897) | 0.4706         | 0.6726                    |

**Univariable analysis of Comorbidities vs Physical Healthy By Day 35 post discharge**

| <i>Outcome</i>  | <i>Effect</i>                                                  | <i>Odds Ratio</i> | <i>95% CI</i> | <i>P-Value</i> | <i>Pr &gt; Chi-Square</i> |
|-----------------|----------------------------------------------------------------|-------------------|---------------|----------------|---------------------------|
| Physical Health | Physical Health Very good, excellent: gender Female vs Male    | 0.417             | (0.194,0.894) | 0.0246         | 0.0721                    |
| Physical Health | Physical Health Good: gender Female vs Male                    | 0.724             | (0.339,1.543) | 0.4025         | 0.0721                    |
| Physical Health | Physical Health Very good, excellent: AgeOlder Age>=60 vs Age  | 0.929             | (0.447,1.929) | 0.8435         | 0.6124                    |
| Physical Health | Physical Health Good: AgeOlder Age>=60 vs Age<60               | 0.704             | (0.331,1.499) | 0.3624         | 0.6124                    |
| Physical Health | Physical Health Very good, excellent: Obese Obese vs Not Obese | 1.933             | (0.912,4.096) | 0.0853         | 0.2170                    |
| Physical Health | Physical Health Good: Obese Obese vs Not Obese                 | 1.341             | (0.625,2.879) | 0.4512         | 0.2170                    |
| Physical Health | Physical Health Very good, excellent: Hypertension Checked vs  | 0.533             | (0.254,1.121) | 0.0972         | 0.0842                    |
| Physical Health | Physical Health Good: Hypertension Checked vs Unchecked        | 0.428             | (0.199,0.921) | 0.0300         | 0.0842                    |
| Physical Health | Physical Health Very good, excellent: Diabetes Checked vs Unc  | 0.308             | (0.138,0.686) | 0.0040         | 0.0055                    |
| Physical Health | Physical Health Good: Diabetes Checked vs Unchecked            | 0.330             | (0.145,0.747) | 0.0079         | 0.0055                    |
| Physical Health | Physical Health Very good, excellent: CardiacIssues Checked v  | 0.925             | (0.299,2.856) | 0.8918         | 0.9050                    |
| Physical Health | Physical Health Good: CardiacIssues Checked vs Unchecked       | 0.768             | (0.231,2.548) | 0.6660         | 0.9050                    |
| Physical Health | Physical Health Very good, excellent: None Checked vs Uncheck  | 2.822             | (0.964,8.263) | 0.0583         | 0.0636                    |
| Physical Health | Physical Health Good: None Checked vs Unchecked                | 3.600             | (1.228,10.55) | 0.0196         | 0.0636                    |

**Univariable analysis of Comorbidities vs Mental Healthy By Day 35 post discharge**

| <i>Outcome</i>  | <i>Effect</i>                                                  | <i>Odds Ratio</i> | <i>95% CI</i> | <i>P-Value</i> | <i>Pr &gt; Chi-Square</i> |
|-----------------|----------------------------------------------------------------|-------------------|---------------|----------------|---------------------------|
| Physical Health | Physical Health Very good, excellent: gender Female vs Male    | 0.374             | (0.160,0.877) | 0.0236         | 0.0759                    |
| Physical Health | Physical Health Good: gender Female vs Male                    | 0.536             | (0.229,1.258) | 0.1520         | 0.0759                    |
| Physical Health | Physical Health Very good, excellent: AgeOlder Age>=60 vs Age  | 1.170             | (0.501,2.732) | 0.7162         | 0.4922                    |
| Physical Health | Physical Health Good: AgeOlder Age>=60 vs Age<60               | 1.583             | (0.672,3.733) | 0.2937         | 0.4922                    |
| Physical Health | Physical Health Very good, excellent: Obese Obese vs Not Obese | 1.945             | (0.832,4.548) | 0.1247         | 0.2381                    |
| Physical Health | Physical Health Good: Obese Obese vs Not Obese                 | 1.299             | (0.549,3.072) | 0.5513         | 0.2381                    |
| Physical Health | Physical Health Very good, excellent: Hypertension Checked vs  | 0.873             | (0.380,2.003) | 0.7481         | 0.8227                    |
| Physical Health | Physical Health Good: Hypertension Checked vs Unchecked        | 1.067             | (0.459,2.477) | 0.8806         | 0.8227                    |
| Physical Health | Physical Health Very good, excellent: Diabetes Checked vs Unc  | 0.895             | (0.345,2.327) | 0.8207         | 0.3093                    |
| Physical Health | Physical Health Good: Diabetes Checked vs Unchecked            | 1.529             | (0.598,3.912) | 0.3756         | 0.3093                    |
| Physical Health | Physical Health Very good, excellent: CardiacIssues Checked v  | 0.528             | (0.171,1.634) | 0.2678         | 0.2875                    |

| <i>Outcome</i>  | <i>Effect</i>                                                 | <i>Odds Ratio</i> | <i>95% CI</i> | <i>P-Value</i> | <i>Pr &gt; Chi-Square</i> |
|-----------------|---------------------------------------------------------------|-------------------|---------------|----------------|---------------------------|
| Physical Health | Physical Health Good: CardiacIssues Checked vs Unchecked      | 0.379             | (0.112,1.285) | 0.1193         | 0.2875                    |
| Physical Health | Physical Health Very good, excellent: None Checked vs Uncheck | 1.042             | (0.366,2.965) | 0.9390         | 0.7086                    |
| Physical Health | Physical Health Good: None Checked vs Unchecked               | 1.389             | (0.492,3.924) | 0.5353         | 0.7086                    |

***Univariable analysis of Comorbidities vs Social Relationships By Day 35 post discharge***

| <i>Outcome</i>       | <i>Effect</i>           | <i>Odds Ratio</i> | <i>95% CI</i> | <i>P-Value</i> | <i>Pr &gt; Chi-Square</i> |
|----------------------|-------------------------|-------------------|---------------|----------------|---------------------------|
| Social Relationships | gender Female vs Male   | 0.523             | (0.278,0.986) | 0.0451         | 0.0451                    |
| Social Relationships | AgeOlder Age>=60 vs Age | 0.725             | (0.398,1.323) | 0.2953         | 0.2953                    |
| Social Relationships | Obese Obese vs Not Obes | 1.035             | (0.568,1.888) | 0.9100         | 0.9100                    |
| Social Relationships | Hypertension Checked vs | 0.962             | (0.531,1.745) | 0.8992         | 0.8992                    |
| Social Relationships | Diabetes Checked vs Unc | 0.745             | (0.382,1.455) | 0.3890         | 0.3890                    |
| Social Relationships | CardiacIssues Checked v | 0.738             | (0.283,1.929) | 0.5361         | 0.5361                    |
| Social Relationships | None Checked vs Uncheck | 0.943             | (0.456,1.951) | 0.8747         | 0.8747                    |
